# Supplementary material for: Expansion of macrophage and liver sinusoidal endothelial cell subpopulations during non-alcoholic steatohepatitis progression
Source: PubMed Central journal article supplement — iScience. 2023 Apr 5;26(5):106572. doi: 10.1016/j.isci.2023.106572 (PMC10131129; doi:10.1016/j.isci.2023.106572), 2023-04-05
Supplement: mmc1.pdf [file mmc1.pdf]

**Supplemental information**

**Expansion of macrophage and liver sinusoidal  
endothelial cell subpopulations during  
non-alcoholic steatohepatitis progression**

**Zhenyang Shen, Bo Shen, Weiming Dai, Cui Zhou, Xin Luo, Yuecheng Guo, Junjun Wang, Xianjun Xu, Zhongshang Sun, Xiaobo Cai, Hui Dong, and Lungen Lu**

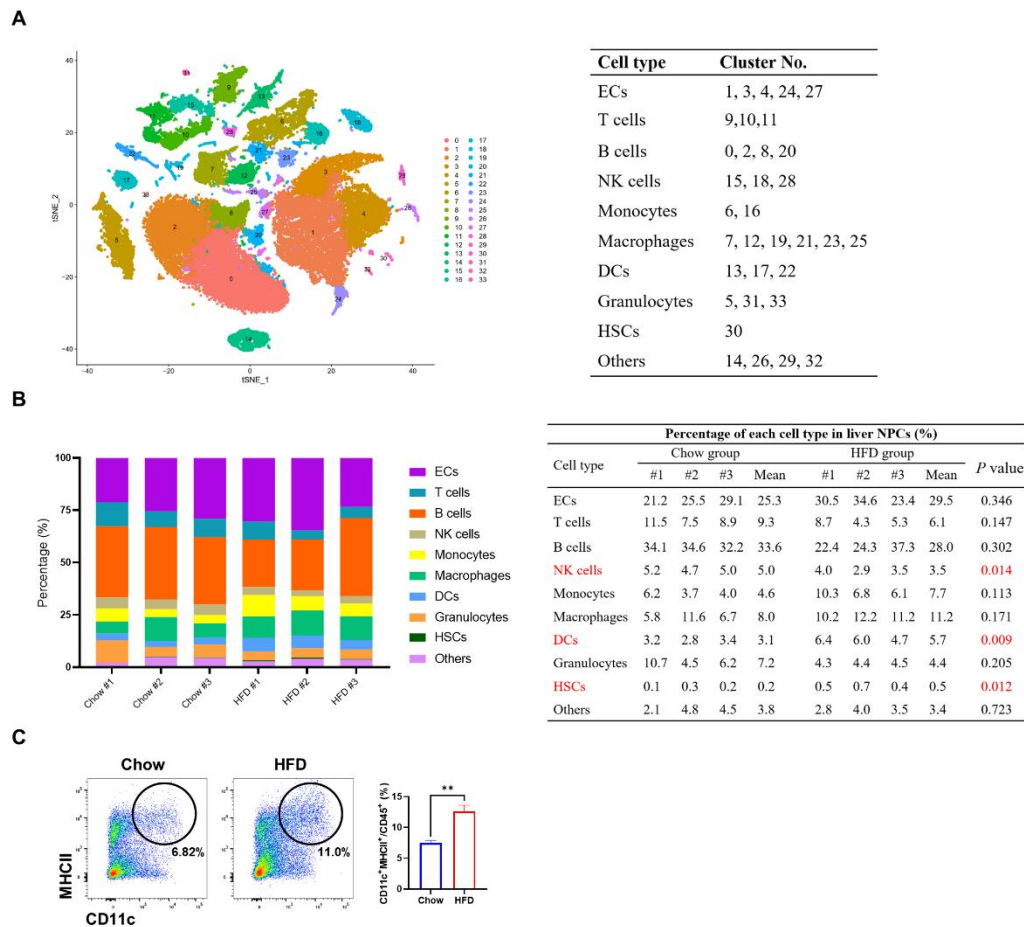

**Figure S1. ScRNA-seq analysis of liver NPCs in healthy and NASH mice, related to Figures 1-3.** (A) t-SNE visualization of liver cell clusters based on 48,272 single cell transcriptomes derived from Chow and HFD mice (left panel). Each cell type consisted of several clusters (right panel). (B) Percentage of each cell type in liver NPCs of Chow and HFD mice. (C) Representative flow-cytometry plot showing the percentage of CD11c<sup>+</sup>MHCII<sup>+</sup> double-positive DCs in CD45<sup>+</sup> cells isolated from Chow and HFD mice liver respectively. The statistics were shown on the right. *n* = 3 per group. The data are expressed as mean ± SEM. Statistical significance is shown as \*\* for *p* < 0.01, as evaluated by Student's *t*-test.



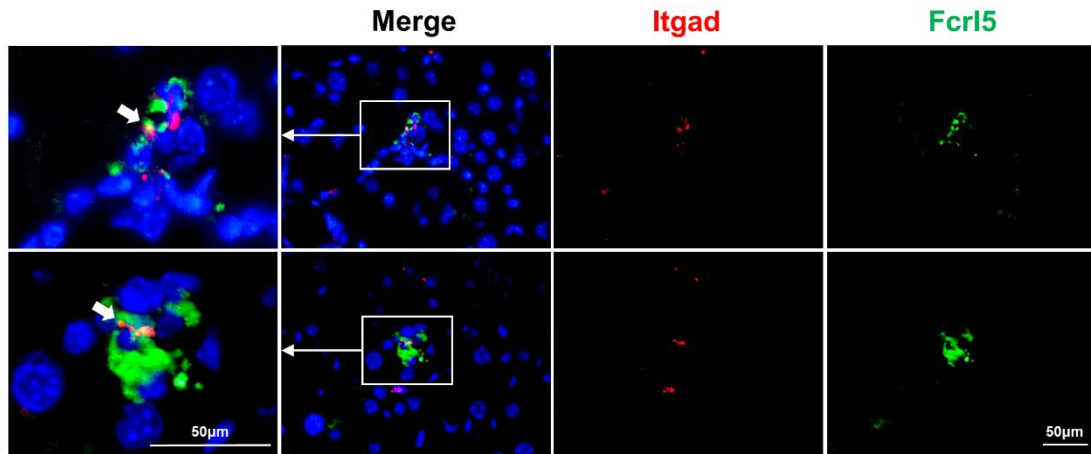

**Figure S3. Representative images of Itgad and Fcrl5 immunofluorescence staining in murine liver tissues, related to Figure 2. Scale bar, 50 μm.**

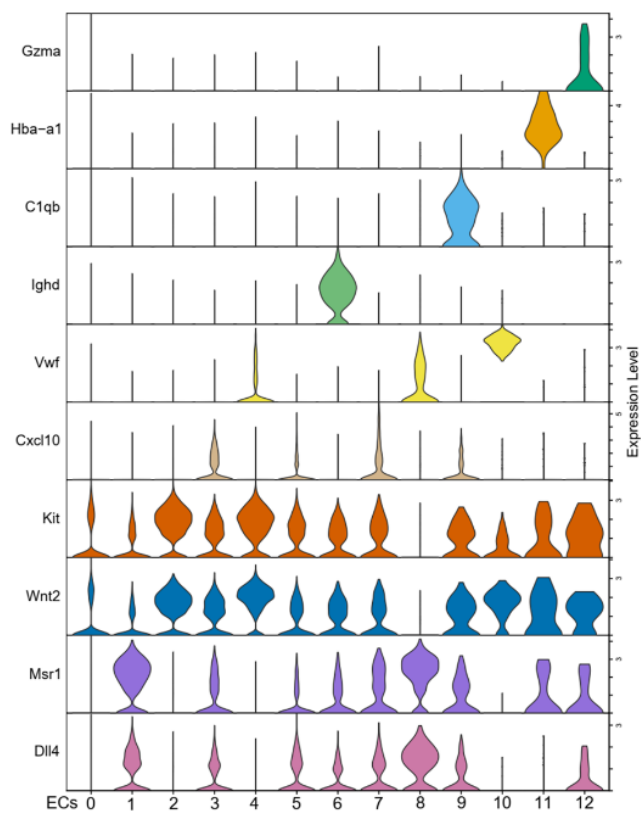

**Figure S4. Representative marker gene expression for each cluster of ECs after re-clustering, related to Figure 3.**

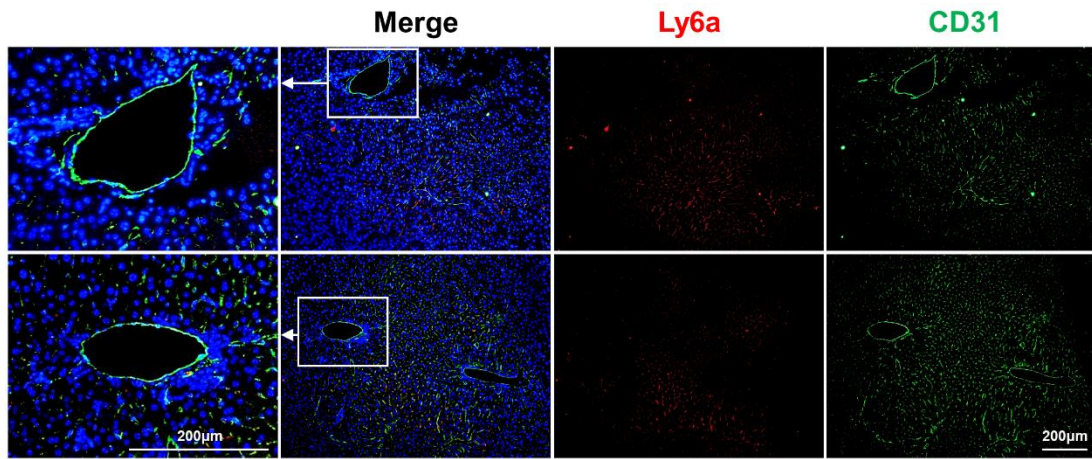

**Figure S5. Representative images of Ly6a and CD31 immunofluorescence staining in murine liver tissues, related to Figure 5. Scale bar, 200 μm.**

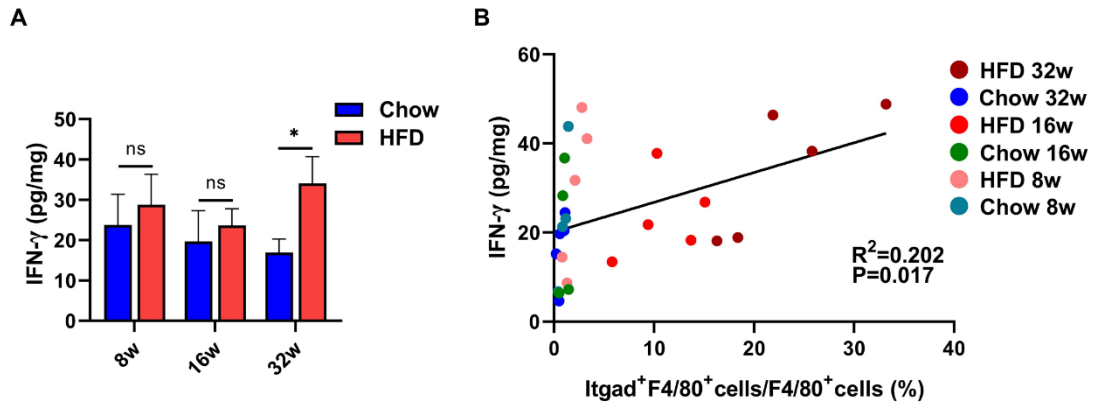

**Figure S6. Hepatic expression of IFN- $\gamma$  and its relationship with the amount of Itgad<sup>+</sup> macrophages in Chow and HFD (week 8, 16 and 32) mice liver, related to Figure 5. (A) The expression of IFN- $\gamma$  in liver tissues of Chow and HFD (week 8, 16 and 32) mice. (B) Correlation of IFN- $\gamma$  expression and the amount of Itgad<sup>+</sup> macrophages in Chow and HFD (week 8, 16 and 32) mice liver. The data are presented as mean  $\pm$  SEM. Statistical significance is shown as \* for  $p < 0.05$ , as evaluated by Student's  $t$ -test.**

**Table S3. Primer sequences for qPCR, related to STAR Methods.**

| Gene           | Sequence (5'→3')           |                          |
|----------------|----------------------------|--------------------------|
|                | Forward primer             | Reverse primer           |
| <i>Trem2</i>   | CTACCAGTGTCAGAGTCTCCGA     | CCTCGAAACTCGATGACTCCTC   |
| <i>GpnmB</i>   | GGCTACTTCAGAGCCACCATCA     | CTTTGCAGGTCACAGTGAAGTCC  |
| <i>Itgad</i>   | GCTTAGGAGTCTGCCTTTGCTG     | GTCAGGTGAACCTTTGCGGACA   |
| <i>Fcrl5</i>   | TTTCTTCAGAAACCTCCAGCTTC    | CCTTGCCTGGTATCTCTTTGACTC |
| <i>Egr1</i>    | TGAGCACCTGACCACAGAGTC      | TGAAAAGGGGTTTCAGGCCAC    |
| <i>Plk2</i>    | GATAACCCAGCAGCCTAGCA       | CTGTCTTCAAGGCATTCGCTG    |
| <i>Ly6a</i>    | GGACTGGAGTGTTACCAGTGCTAT   | TGTTTGAGAATCCACAATAACTGC |
| <i>Ifit1</i>   | AAAGGTCTAAAAGTGGAAGAGAAGTC | AAGATGAACATTCTGACAAACACG |
| <i>Ifit3</i>   | GCTCAGGCTTACGTTGACAAGG     | CTTTAGGCGTGTCCATCCTTCC   |
| <i>Isg15</i>   | CATCCTGGTGAGGAACGAAAGG     | CTCAGCCAGAACTGGTCTTCGT   |
| <i>Coll1a1</i> | CCTCAGGGTATTGCTGGACAAC     | TTGATCCAGAAGGACCTTGTTTG  |
| <i>Gapdh</i>   | CATCACTGCCACCCAGAAGACTG    | ATGCCAGTGAGCTTCCCGTTCAG  |
